# Supplementary material for: Analytic approaches to clinical validation of results from preclinical models of glioblastoma: a systematic review
Source: bioRxiv or medRxiv preprint supplement (doi:10.1101/2021.09.04.21263119), 2022-01-22
Supplement: Supplementary file [file media-2.pdf]

**S2 Table.** References to specific analyses extracted for comparison of results on molecular markers

| Molecular marker | Author                   | Analysis type | Association | Location of analysis in manuscript                                                                                                                                                         |
|------------------|--------------------------|---------------|-------------|--------------------------------------------------------------------------------------------------------------------------------------------------------------------------------------------|
| CXCL14           | Zeng 2018                | U             | ▼           | Figure 3K reporting p=0.02809                                                                                                                                                              |
|                  |                          | M             | □           | Supplementary Table 2 reporting HR 1.04 p=0.352                                                                                                                                            |
| EGFR             | Kuang 2018<br>Li 2018    | U             | ▼           | Figure 7, top survival curve in left panel reporting p=0.0009                                                                                                                              |
|                  |                          | U             | □           | Figure 4A lower panel reporting p=0.216                                                                                                                                                    |
| HOTAIR           | Xavier-Magalhaes 2018    | U             | ▼           | Figure 4B p=0.032                                                                                                                                                                          |
|                  |                          | M             | ▼           | Supplementary Table 2 p=0.036                                                                                                                                                              |
| IDO1             | Zhai 2017                | U             | ▼           | Figure 2C right panel, p<0.05                                                                                                                                                              |
|                  |                          | M             | ▼           | Table 1, HR 1.82 (95% CI 1.17-2.81) p=0.0076                                                                                                                                               |
| IL-8             | Hasan 2019               | U             | ▼           | Figure 2B top left panel p=0.0112                                                                                                                                                          |
|                  |                          | M             | ▼           | Legend of Figure 2B, HR 1.07, 95% CI 1.01-1.14), p=0.0467                                                                                                                                  |
| MARCKS           | Jarboe 2012              | U             | ▲           | Figure 6B, p=0.0002                                                                                                                                                                        |
|                  |                          | M             | ▲           | Supplementary Table 2, HR 0.21 (95% CI 0.09-0.48), p=0.0002                                                                                                                                |
| miR-17-5p        | Zeng 2018                | U             | ▲           | Figure 6D reporting p=0.0006                                                                                                                                                               |
|                  |                          | M             | □           | "After incorporating the age and molecular subtype factors, the analysis indicated that miR-17-5p value was not an independent prognostic marker for the overall survival of GBM patients" |
| miR-181d         | Genovese 2012<br>Ho 2017 | U             | □           | Supplementary Table 6 on page 606 of supplementary PDF file, p=0.46                                                                                                                        |
|                  |                          | U             | □           | Figure 4D, p=0.067                                                                                                                                                                         |
| miR-34a          | Genovese 2012            | U             | ▼           | Figure 3D reporting p=0.0154                                                                                                                                                               |
|                  |                          | M             | ▼           | Supplementary Table 7 on page 607 of supplementary PDF file reporting p=0.0016                                                                                                             |
| NTN4             | Hu 2012<br>Li 2018       | U             | ▲           | Figure 3B, p<0.05                                                                                                                                                                          |
|                  |                          | U             | □           | Figure 4B, lower panel, p=0.753                                                                                                                                                            |
| PD-L1            | Nduom 2016               | U             | ▼           | Figure 4A, p=0.231                                                                                                                                                                         |
|                  |                          | M             | ▼           | Text: "HR 1.54, 95% CI 1.05-2.28, p=0.0231"                                                                                                                                                |
| POSTN            | Mega 2020                | U             | ▼           | Table 2, HR 1.35, 95% CI 1.11-1.64, p=0.002                                                                                                                                                |
|                  | Liu 2019                 | U             | ▼           | Figure 7h, p=0.0003                                                                                                                                                                        |
|                  | Mega 2020                | M             | ▼           | Table 2, HR 1.37, 95% CI 1.06-1.77, p=0.017                                                                                                                                                |
| SFRP1            | Delic 2014               | U             | ▲           | Figure 7B, p<0.05                                                                                                                                                                          |
|                  |                          | M             | ▲           | Table 1, HR 0.782 (95%CI 0.642-0.953), p=0.015                                                                                                                                             |
| Sox2             | Sathyan 2015             | U             | ▲           | Figure 6C, 0=0.0307                                                                                                                                                                        |
|                  |                          | M             | □           | Text "...after correcting for age and KPS, Sox2 lost significance (p=0.0964)"                                                                                                              |
| SRGN             | Mega 2020                | U             | ▼           | Table 2, HR 1.63, 95% CI 1.19-2.23, p=0.002                                                                                                                                                |
|                  |                          | M             | □           | Table 2, HR 1.29, 95% CI 0.83-2.00, p=0.263                                                                                                                                                |

Molecular markers ordered alphabetically accompanied with the location of analysis in the original manuscript. U = univariable survival analysis; M = multivariable survival analysis; ▲ = positive association i.e. higher levels of the molecular marker associated with better survival and p<0.05; ▼ = negative association i.e. lower levels of molecular marker associated with worse survival and p<0.05; □ = statistical significance not demonstrated (p≥0.05)
