# Supplementary material for: Analytic approaches to clinical validation of results from preclinical models of glioblastoma: a systematic review
Source: bioRxiv or medRxiv preprint supplement (doi:10.1101/2021.09.04.21263119), 2022-01-22

**S1 Figure. Common analytic strategy used by included studies.**

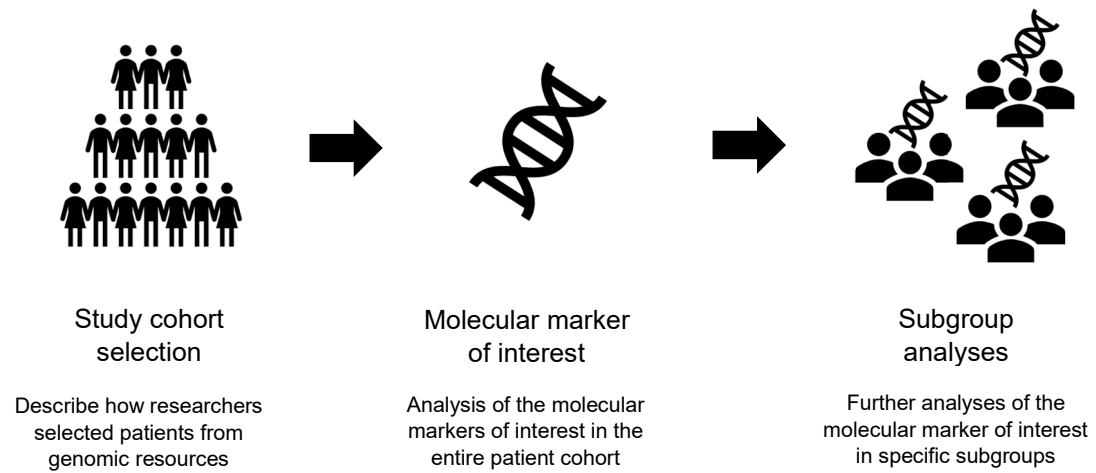

Supplement: Supplementary file [file media-4.pdf]
