# Supplementary material for: Analytic approaches to clinical validation of results from preclinical models of glioblastoma: a systematic review
Source: bioRxiv or medRxiv preprint supplement (doi:10.1101/2021.09.04.21263119), 2022-01-22
Supplement: Supplementary file [file media-6.pdf]

## **S1 Supporting Information**

### Eligibility criteria

#### Inclusion:

- Patients ( $\geq 18$  years old) diagnosed with non-recurrent histopathologically confirmed glioblastoma according to WHO classification
- Studies which utilised TCGA/CGGA resources or included TCGA/CGGA patients with other patients
- Studies reporting overall survival
- Studies reporting on association between genetic or molecular markers with survival
  - Gene expression, variants, methylation

#### Exclusion:

- Case reports, reviews, editorials
- Studies which only report their own patient cohort and does not include TCGA/CGGA resources
- Studies which report results only for patients ( $< 18$  years old)
- Studies which include patients  $< 18$  years old and have not separated their data from those  $>18$
- Studies that reported progression free survival only
- Studies including patients with recurrent glioblastoma only
- Patients without a histopathological confirmed glioblastoma diagnosis according to WHO classification
